# Supplementary material for: Public health implications of changing patterns of recruitment into the South African mining industry, 1973–2012: a database analysis
Source: PubMed Central journal article supplement (PMC5543439; doi:10.1186/s12889-017-4640-x), 2017-08-03

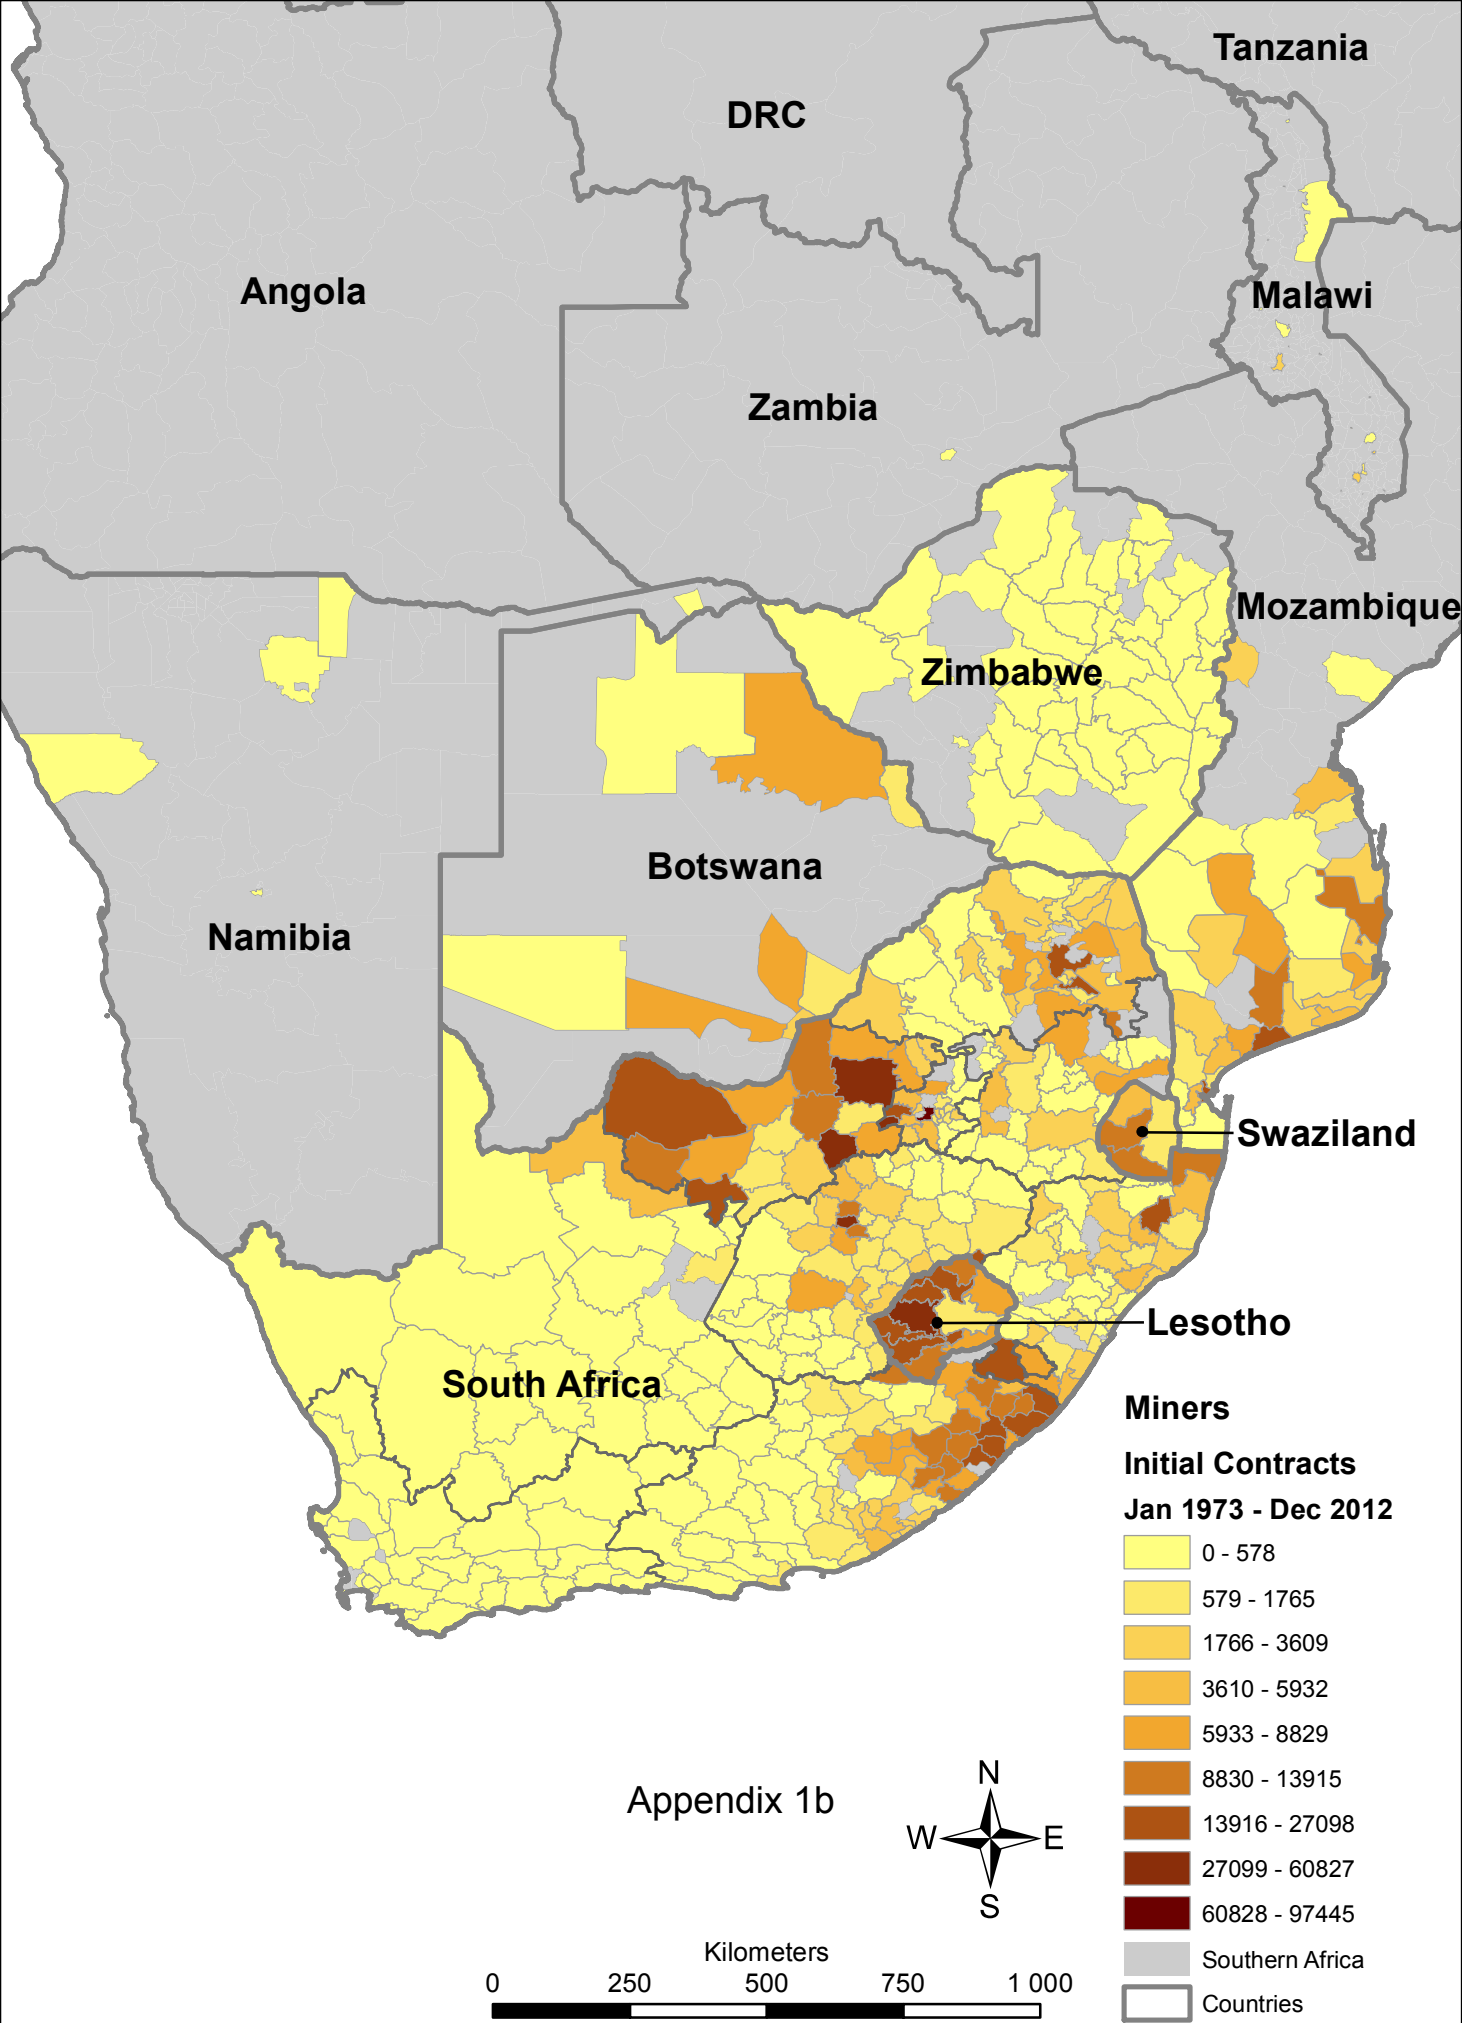

Supplement: 12889_2017_4640_MOESM4_ESM.pdf [file 12889_2017_4640_MOESM4_ESM.pdf]
